# Supplementary material for: Sequencing of Lynch syndrome tumors reveals the importance of epigenetic alterations
Source: PubMed Central journal article supplement (PMC5746122; doi:10.18632/oncotarget.22445), 2017-11-14
Supplement: oncotarget-08-108020-s001.pdf [file oncotarget-08-108020-s001.pdf]

# Sequencing of Lynch syndrome tumors reveals the importance of epigenetic alterations

## SUPPLEMENTARY MATERIALS

### Relative shares of somatic mutations stratified by mutant allele frequency and mutation type

A. Epigenetic genes in colorectal specimens (n = 29)

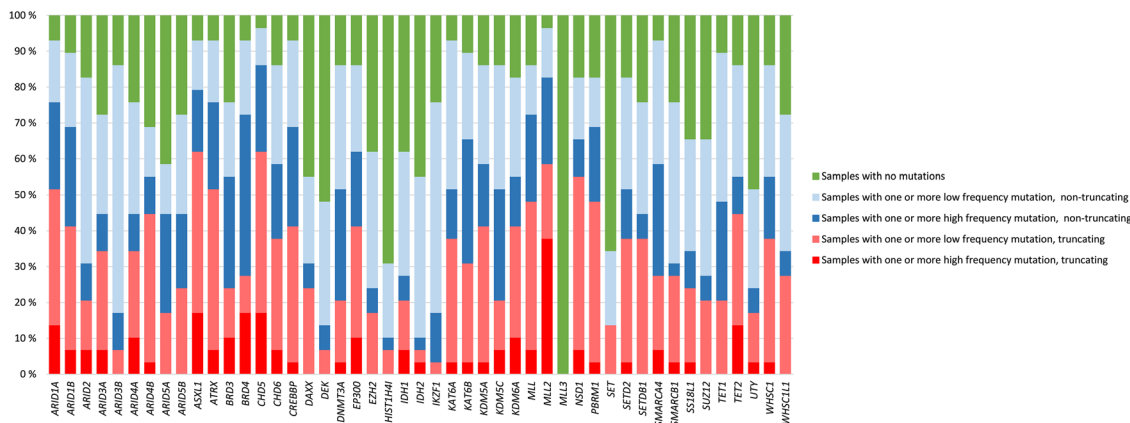

B. Epigenetic genes in ovarian carcinomas (n = 16)

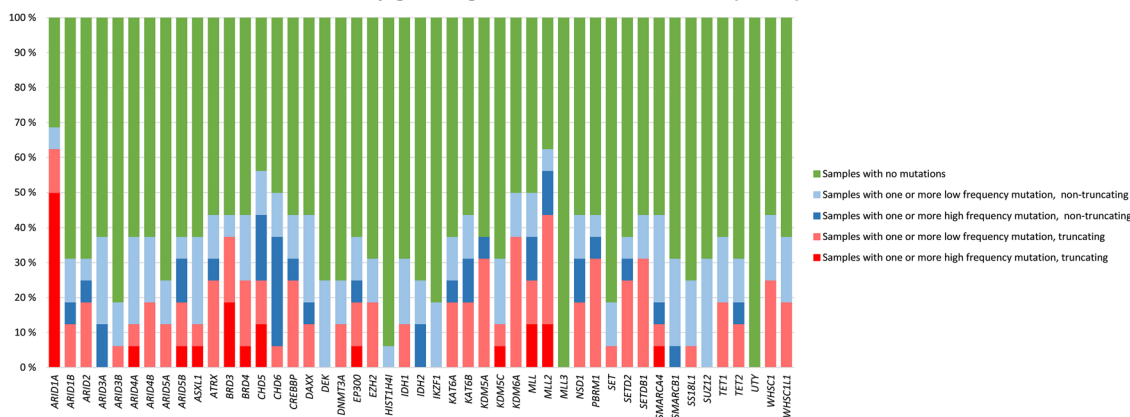

(Continued)

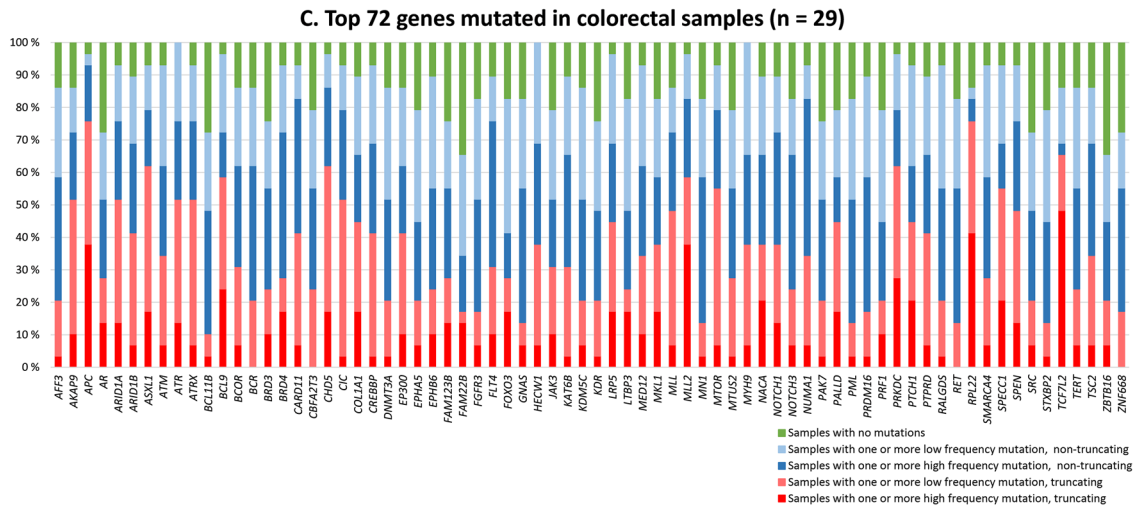

### D. Top 10 genes mutated in ovarian carcinoma samples (n = 16)

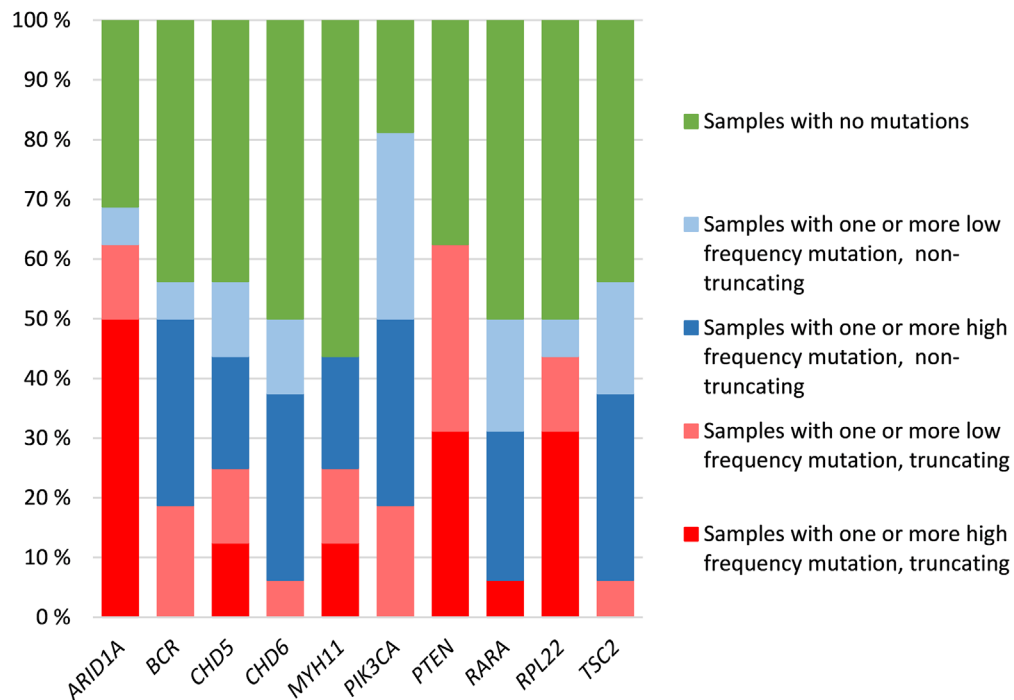

Supplementary Figure 1: (A-D) Relative shares of somatic mutations stratified by mutant allele frequency and mutation type.

**Supplementary Table 1: Somatic point mutations as second hits in LS tumors stratified by LOH**

See Supplementary File 1

**Supplementary Table 2: Correlation between promoter methylation and somatic mutation tendencies**

See Supplementary File 2

**Supplementary Table 3: Distributions of genes according to their tendency to acquire high-frequency mutations**

See Supplementary File 3

**Supplementary Table 4: Pathway annotations of top 72 colorectal tumor and top 10 ovarian carcinoma-associated genes**

See Supplementary File 4

**Supplementary Table 5: Specification of all somatic mutations detected in 72 colorectal tumor and 10 ovarian carcinoma-associated genes**

See Supplementary File 5

**Supplementary Table 6: Performance characteristics of panel sequencing**

See Supplementary File 6
